# Supplementary material
Source: Springer Nature journal article supplement (https://www.springermedizin.de/resource/supplementary/12939_2010_190_MOESM5_ESM.pdf/9550562)

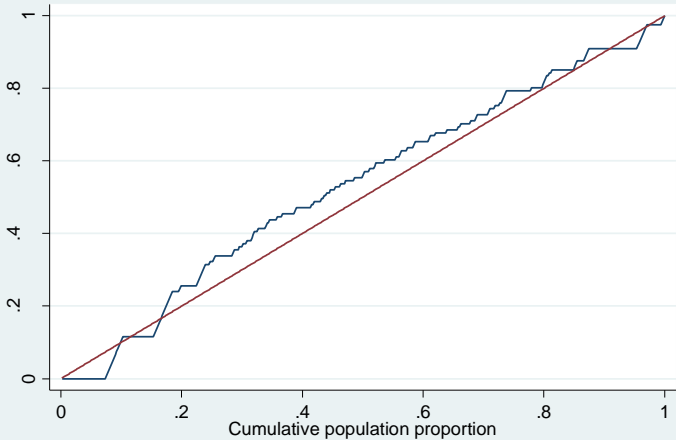

— Conc curve (HIV trans)    — Equality line

Supplement: MOESM5 [file 9550562]
